# Supplementary material for: Adult Mouse Liver Contains Two Distinct Populations of Cholangiocytes
Source: PubMed Central journal article supplement — Stem Cell Reports. 2017 Jul 6;9(2):478–89. doi: 10.1016/j.stemcr.2017.06.003 (PMC5549808; doi:10.1016/j.stemcr.2017.06.003), 2017-07-06
Supplement: mmc1.pdf [file mmc1.pdf]

**Stem Cell Reports, Volume 9**

**Supplemental Information**

**Adult Mouse Liver Contains Two Distinct Populations of  
Cholangiocytes**

**Bin Li, Craig Dorrell, Pamela S. Canaday, Carl Pelz, Annelise Haft, Milton  
Finegold, and Markus Grompe**

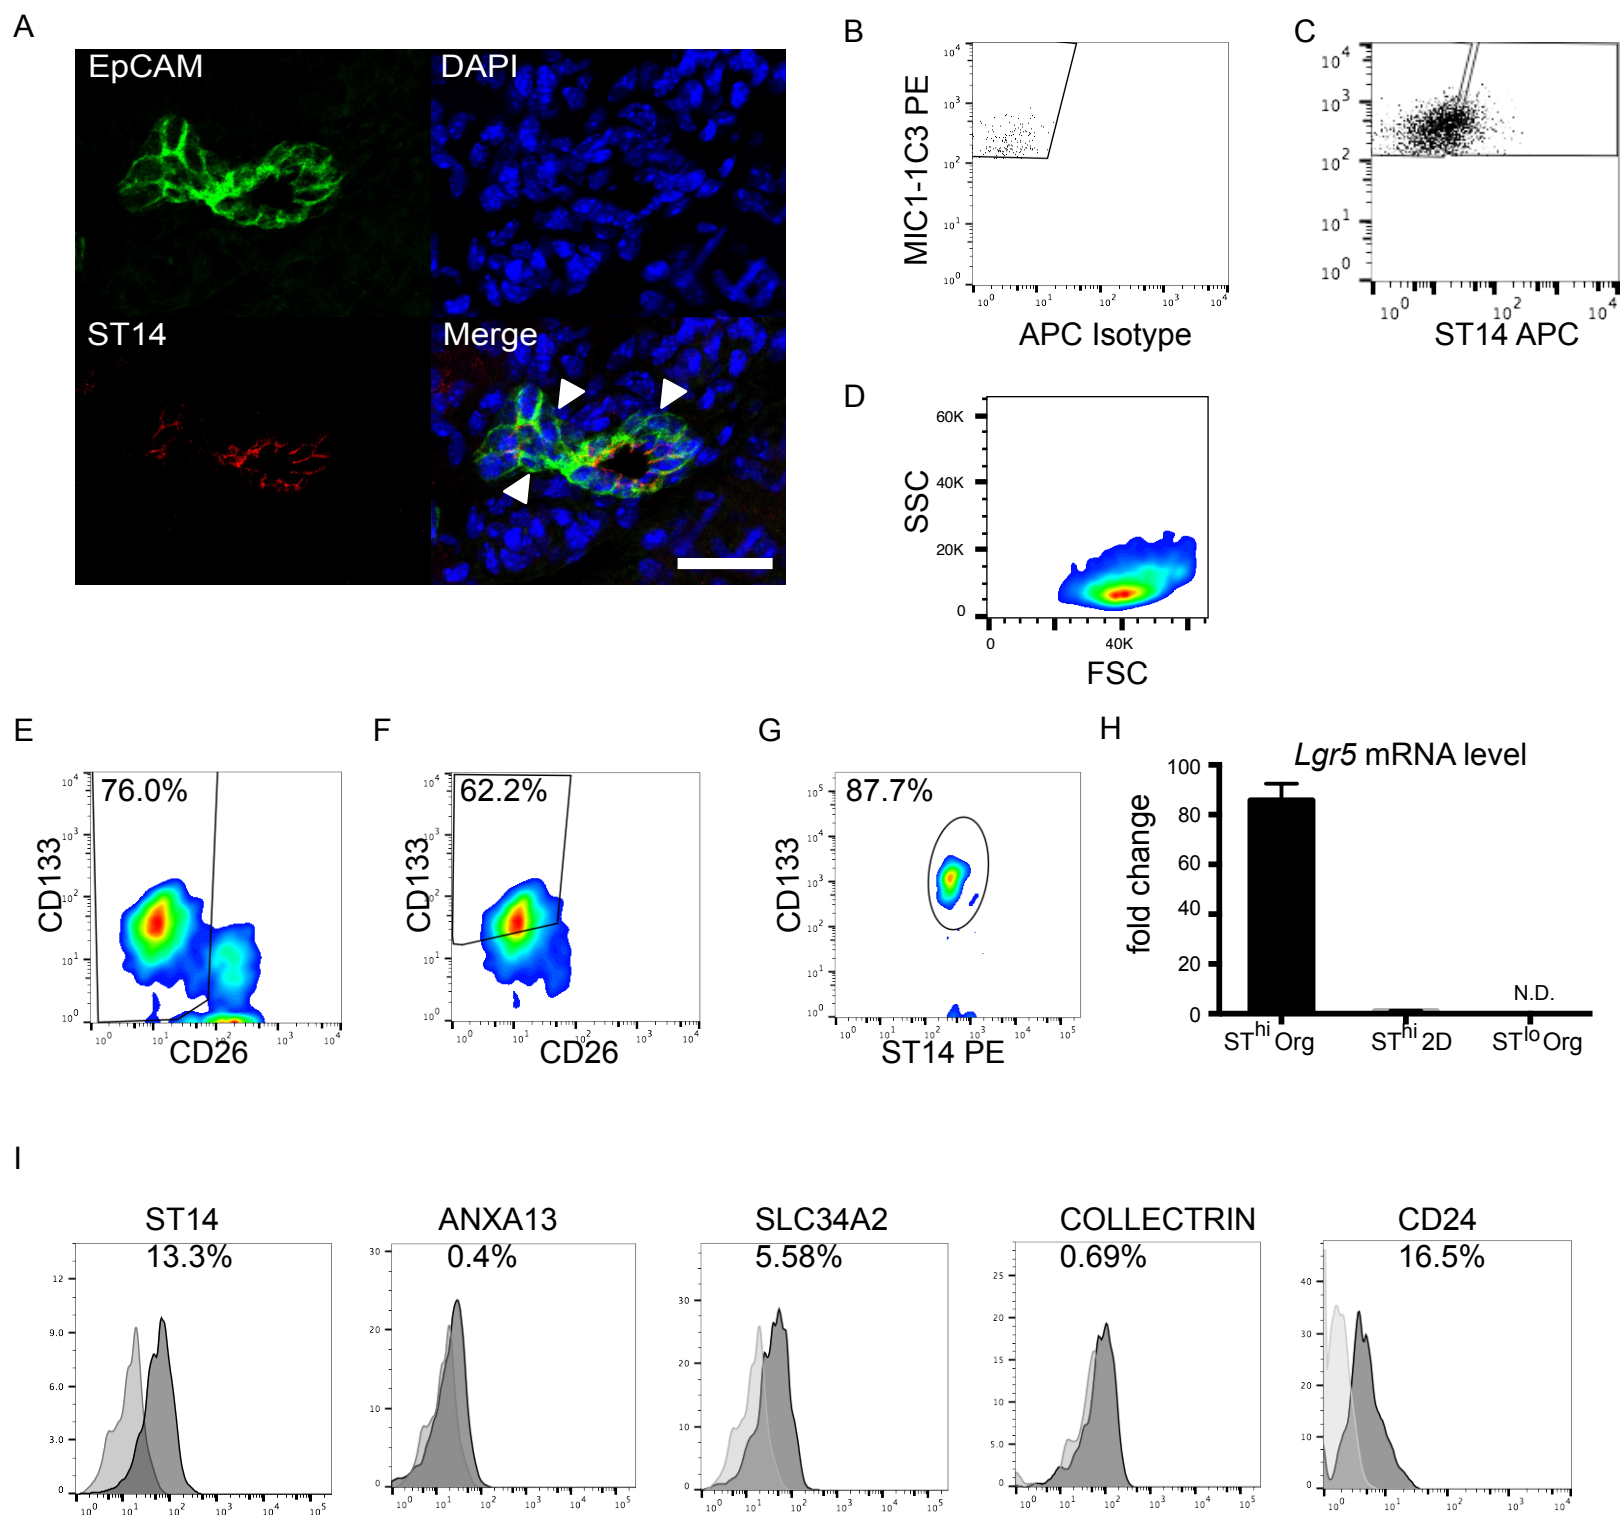

**Figure S1 Related to Figure 1. Evaluation of duct-subdividing antibody candidates.**

(A) Representative immunohistochemistry of ST14 (red) and EpCAM (green) colocalization in mouse liver duct cells. DAPI: blue. Scale bar = 50  $\mu$ m. (B-D) Flow cytometry analyses of M+26-CD45/31/11b-PI- cells stained with (B) secondary APC isotype control only and (C) the ST14 primary antibody. (D) Size and scatter properties of fully gated ST14<sup>lo</sup>M+ cells. (E-G) Flow cytometry analyses showing the extent of CD133 and ST14 coexpression in duct cells. (E) 76% of M+CD45/31/11b-PI- cells are CD26 negative. (F) in the M+CD26-CD45/31/11b-PI- cells from (E) 62.2% are CD133 expressing. (G) 87.7% of the M+ST14<sup>hi</sup> cells are CD133 positive. (H) *Lgr5* mRNA expression was activated by the organoid culture conditions in the ST14<sup>hi</sup> but not in the ST14<sup>lo</sup> organoids. (I) Antigen screening for ST14, ANXA13, SLC34A2, COLLECTRIN and CD24 in the CD26-M+ duct cells. Lighter grey delineates the isotype control.



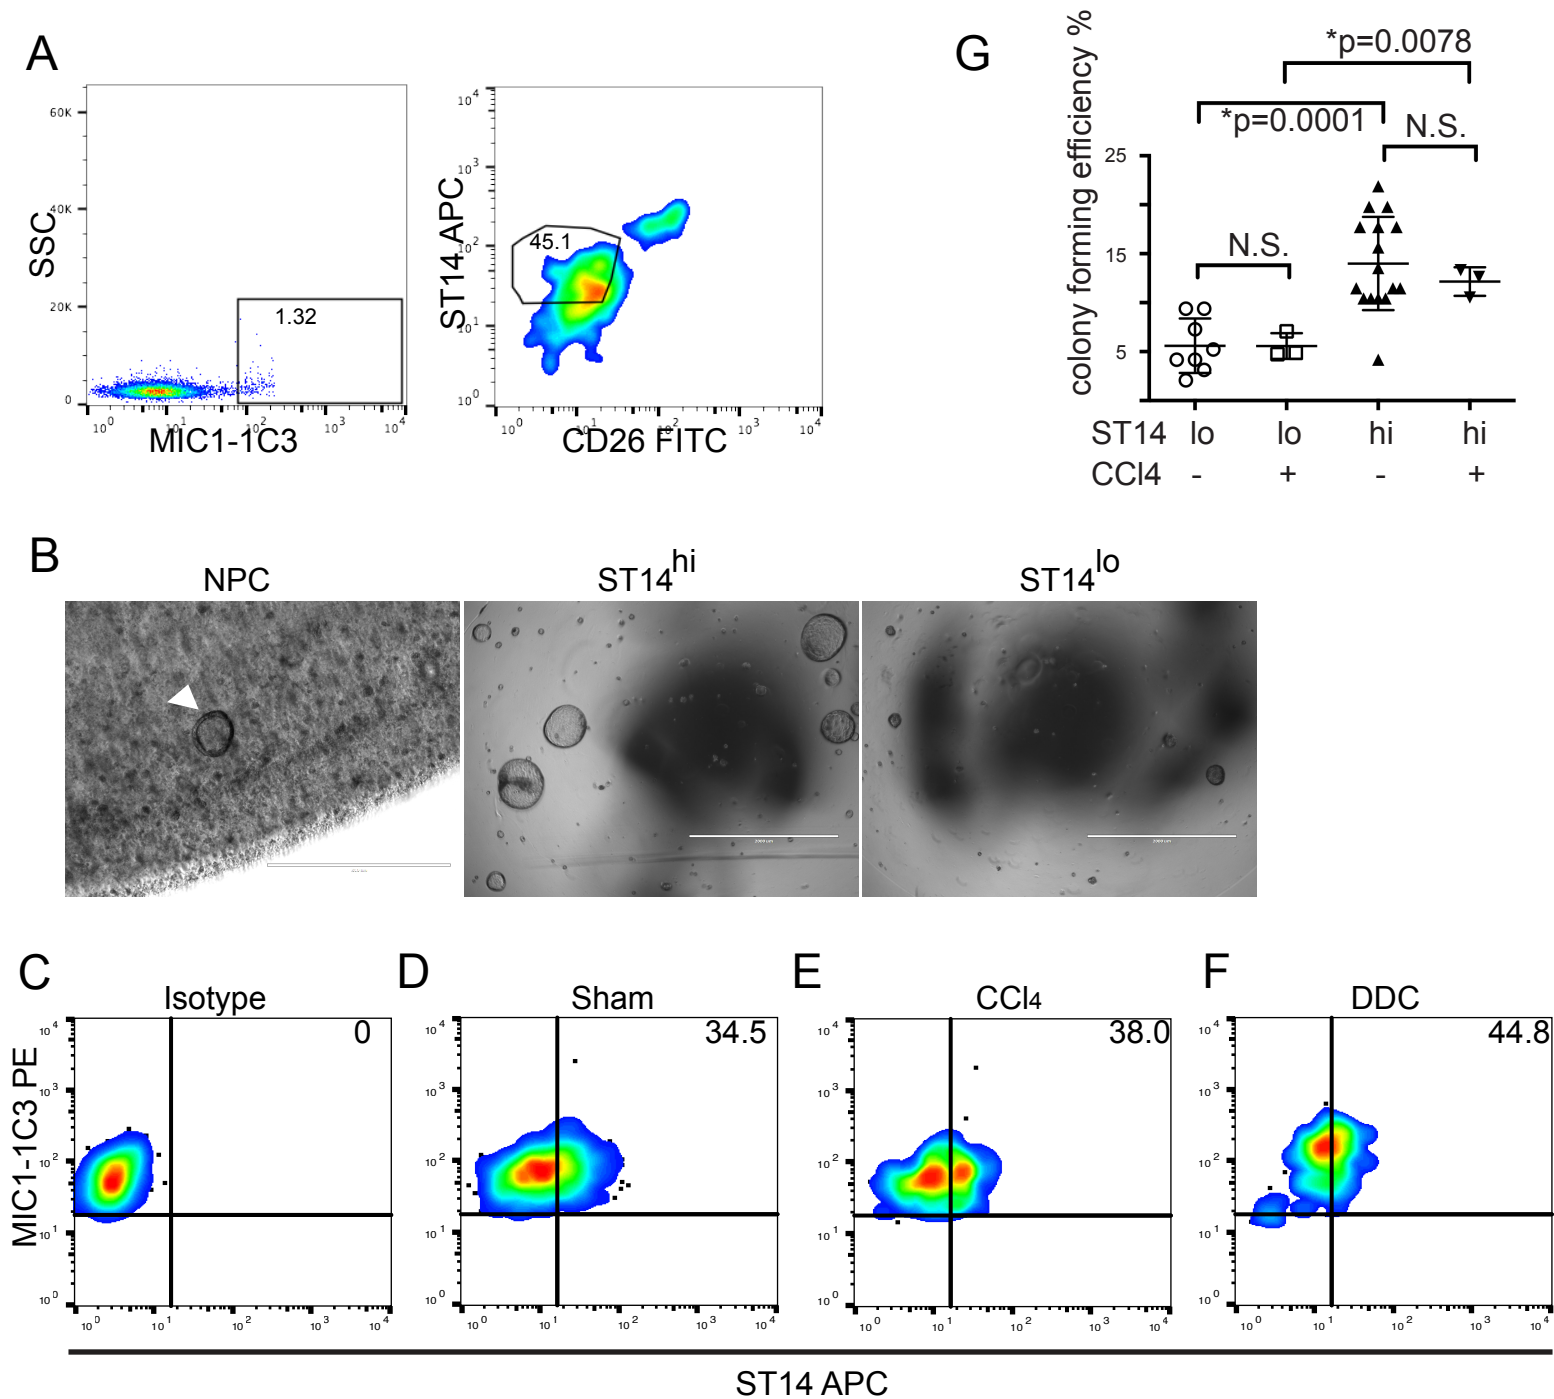

**Figure S2 Related to Figure 2. Clonogenic duct cells survival during ischemia and in the injured liver**

Flow cytometry analyses for MIC1-1C3<sup>+</sup> and ST14. 45% of MIC1-1C3<sup>+</sup> duct cells were ST14<sup>hi</sup> after 24hrs of warm ischemia. After warm ischemia organoid formation was strictly limited to only ST14<sup>hi</sup> ductal cells. Far left panel: unsorted liver NPCs in organoid cell culture. FACS sorted ST14<sup>hi</sup> (middle panel) and ST14<sup>lo</sup> (far right panel) cells were embedded in Matrigel droplets at a density of 2,000 per 24 well. Culture date 14. No organoids formed from the ST14<sup>lo</sup> population. (C-G) ST14 expression in M<sup>+</sup> liver duct cells in uninjured controls (D) and CCI4 induced liver injury day 6 (E) and DDC treated liver day 6 (F). CCI4 was diluted in corn oil and administrated via I.P. injection at single dose of 1ml/kg body weight. Sham: corn oil only. Isotype control was used as negative gating. (G) NPCs from livers injured by CCI4 were sorted into 96 well dishes for single cell organoid analysis. There were no significant injury-induced differences in the organoid forming ability of either population. ST14<sup>hi</sup> cells were superior to ST14<sup>lo</sup> duct cells under both conditions. Statistical analyses: Mann-Whitney U test for normal vs treated, paired t test for ST14<sup>hi</sup> vs ST14<sup>lo</sup>. Independent mice treated with CCI4 n=3; Independent mice treated with sham n=4.

A

Sorted cells from ST14 large organoid

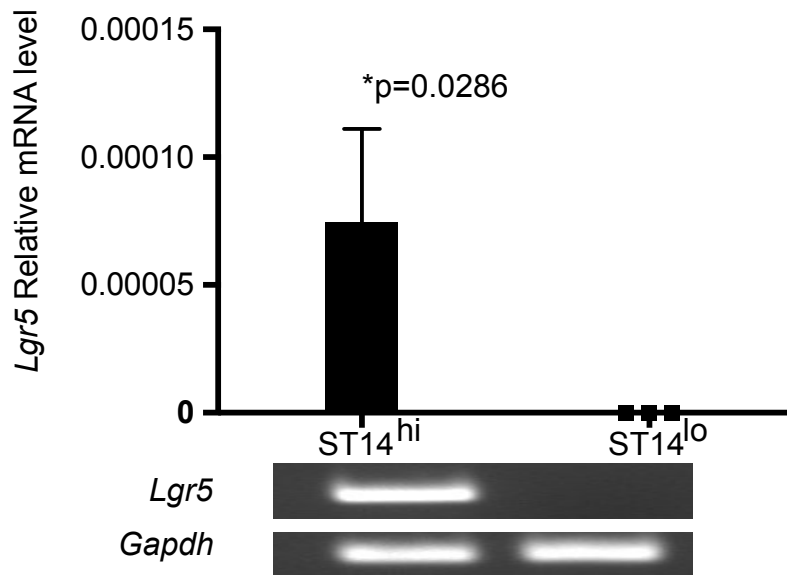

B

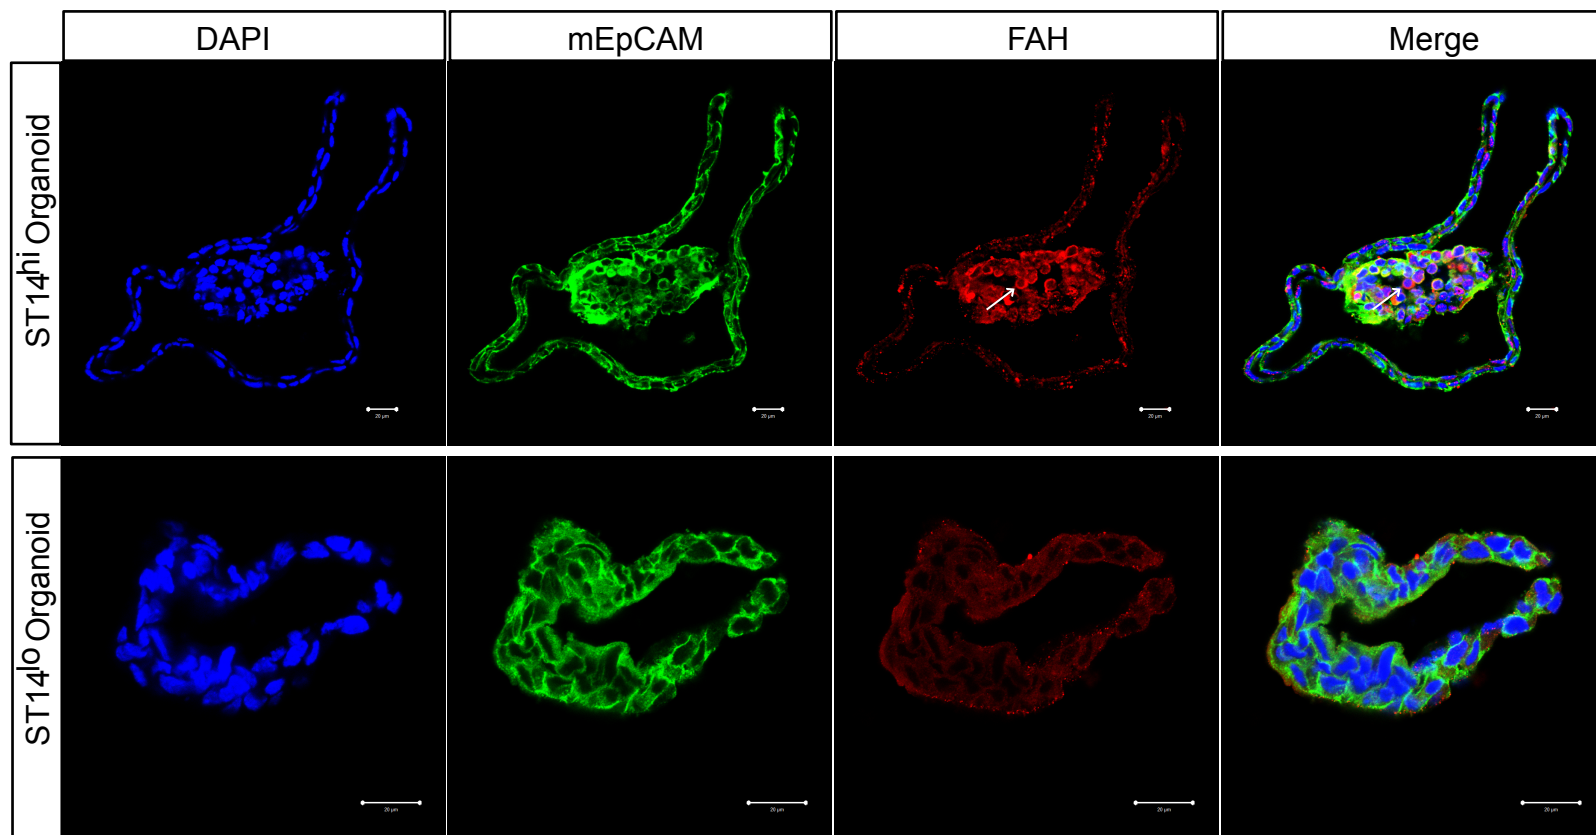

### Figure S3. Related to Figure 3. Characterization of ST14<sup>hi</sup> derived organoids in vitro.

ST14<sup>hi</sup> derived organoids at passage 1 were dissociated and resorted using surface marker ST14 as in Figure 2I. (A) Relative *Lgr5* mRNA level from the ST14<sup>hi</sup> and ST14<sup>lo</sup> population detected by qPCR. Relative *Lgr5* mRNA expression was normalized to house keeping gene *Gapdh*. Single bands for the *Lgr5* and *Gapdh* PCR products were confirmed by agarose gel. Quantities were calculated with  $-\Delta\Delta Ct$ . Independent experiments n=3, unpaired t test. \*P=0.0286. (B) Immunofluorescence staining showed Fah expression in cultured ST14<sup>hi</sup> and ST14<sup>lo</sup> derived organoids. Arrow shows FAH+ but EpCAM- cells. Scale bar = 20 μm.

**A**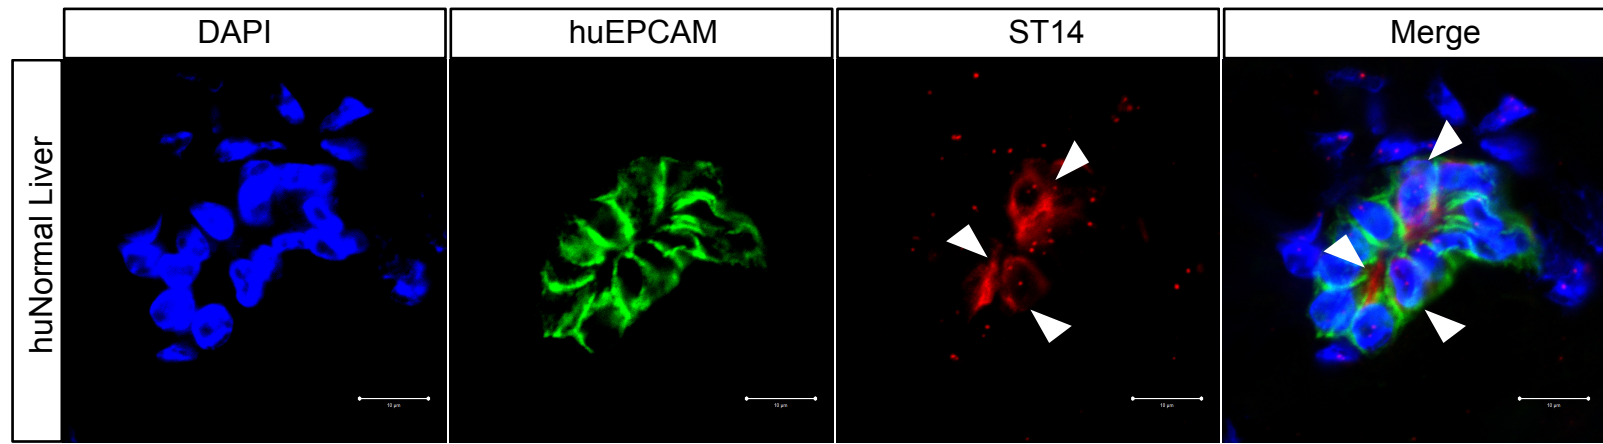**B**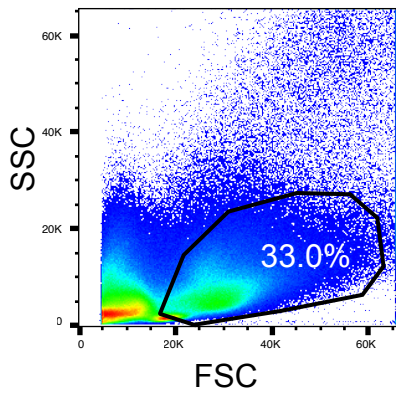**C**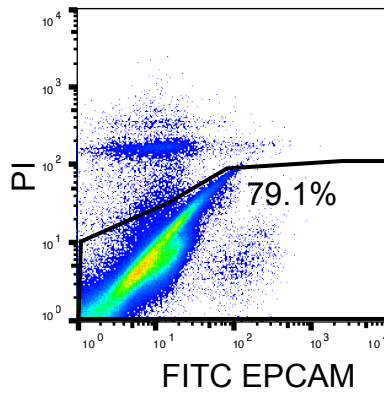**D**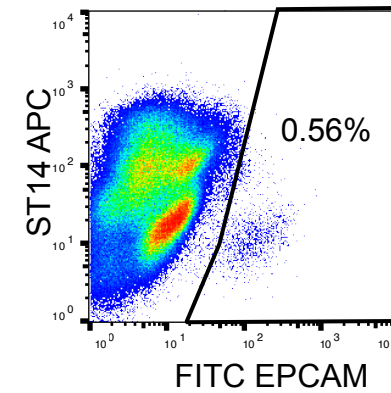**E**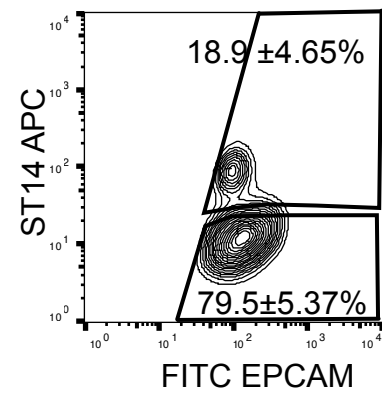**F**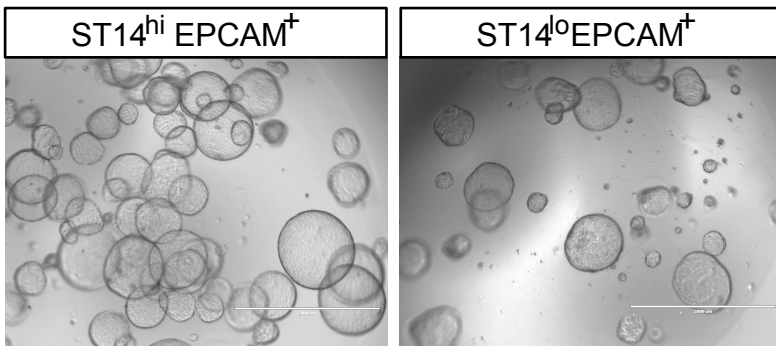

**Figure S4. Related to Figure 5. ST14 protein expression in human liver.**

(A) Immunofluorescence showed the ST14(red) expression in the EPCAM(green) expressing duct cells in the human liver. Nuclei stained with DAPI as blue. Arrow heads show the ST14 expressing cells. Scale bar = 20  $\mu$ m. (B-E) Primary human liver NPCs were FACS analyzed after staining with EPCAM and ST14. In the EPCAM+ subpopulation, 18.9 $\pm$ 4.65% cells were ST14hi (Independent patients n=3, unpaired t test, \*p=0.001) (E). (F) Sorted cells were put into matrigel organoid culture at a density of 2000 cells/well in the 24 well suspension culture plate. Scale bar = 2 mm.

Table S1 Selected hepatic biliary and progenitor markers in ST14<sup>hi</sup> vs ST14<sup>lo</sup> populations

| Gene  |                                                             | Transcript | ST14 <sup>hi</sup> | ST14 <sup>lo</sup> | FC    | Pval | FDR  |
|-------|-------------------------------------------------------------|------------|--------------------|--------------------|-------|------|------|
| St14  | Suppression of tumorigenicity 14 (colon)                    | NM_011176  | 100                | 100                | 1.1   | 1.09 | 0.35 |
| Krt19 | Keratin 19                                                  | NM_008471  | 617.75             | 428.5              | -1.44 | 0.32 | 0.54 |
| Sox9  | SRY (sex determining region Y)-box 9                        | NM_011448  | 114.3              | 119.8              | -1.05 | 0.56 | 0.65 |
| Epcam | Epithelial cell adhesion molecule                           | NM_008532  | 334.3              | 346.8              | -1.04 | 0.67 | 0.69 |
| Hnf1b | Transcription factor 2,transcription factor 2,              | NM_009330  | 195.75             | 207.25             | 1.06  | 0.55 | 0.65 |
| Cftr  | Cystic fibrosis transmembrane conductance                   | NM_021050  | 16.25              | 20.5               | 1.26  | 0.07 | 0.32 |
| Prom1 | Prominin 1 (CD133 antigen)                                  | NM_008935  | 181.75             | 187.75             | 1.03  | 0.83 | 0.73 |
| Lgr5  | Leucine rich repeat containing G protein coupled receptor 5 | NM_010195  | 0.25               | 0                  | 2.5   | 0.02 | 0.17 |
| Thy1  | Thymus cell antigen 1, theta                                | NM_009382  | 3                  | 1.25               | 2.4   | 0.11 | 0.37 |
| Icam1 | Intercellular adhesion molecule 1                           | NM_010493  | 59.5               | 36.25              | 1.64  | 1    | 1    |
| Bmi1  | Bmi1 polycomb ring finger oncogene                          | NM_007552  | 32.75              | 34.75              | -1.06 | 0.7  | 0.7  |
| Cd47  | CD47 antigen                                                | NM_010581  | 52.25              | 67.5               | -1.29 | 0.06 | 0.3  |

Tag numbers are given in RPKM for the ST14<sup>hi</sup> and ST14<sup>lo</sup> populations; FC = fold change. None of the genes listed were differentially expressed between progenitor and non-progenitor ducts.

Table S2 Selected gene sets significantly enriched in the clonogenic ST14<sup>hi</sup> population

| NAME                                                   | ES   | NOM p-val | FDR q-val |
|--------------------------------------------------------|------|-----------|-----------|
| BOQUEST_STEM_CELL_UP                                   | 0.53 | 0.00      | 0.00      |
| ANASTASSIOU_CANCER_MESENCHYMAL_TRANSITION_SIGNATURE    | 0.64 | 0.00      | 0.00      |
| LIM_MAMMARY_STEM_CELL_UP                               | 0.46 | 0.00      | 0.00      |
| LIEN_BREAST_CARCINOMA_METAPLASTIC                      | 0.67 | 0.00      | 0.00      |
| VECCHI_GASTRIC_CANCER_ADVANCED_VS_EARLY_UP             | 0.47 | 0.00      | 0.00      |
| ONDER_CDH1_SIGNALING_VIA_CTNNB1                        | 0.53 | 0.00      | 0.00      |
| SERVITJA_ISLET_HNF1A_TARGETS_UP                        | 0.47 | 0.00      | 0.00      |
| MIKKELSEN_IPS_ICP_WITH_H3K4ME3_AND_H327ME3             | 0.50 | 0.00      | 0.00      |
| STAMBOLSKY_TARGETS_OF_MUTATED_TP53_UP                  | 0.56 | 0.00      | 0.01      |
| EBAUER_TARGETS_OF_PAX3_FOXO1_FUSION_UP                 | 0.43 | 0.00      | 0.01      |
| ACEVEDO_LIVER_CANCER_WITH_H3K27ME3_DN                  | 0.44 | 0.00      | 0.01      |
| KEGG_HEDGEHOG_SIGNALING_PATHWAY                        | 0.50 | 0.00      | 0.02      |
| PLASARI_TGFB1_TARGETS_10HR_UP                          | 0.38 | 0.00      | 0.02      |
| BOQUEST_STEM_CELL_CULTURED_VS_FRESH_UP                 | 0.35 | 0.00      | 0.02      |
| SWEET_KRAS_TARGETS_UP                                  | 0.44 | 0.00      | 0.02      |
| WIEDERSCHAIN_TARGETS_OF_BMI1_AND_PCGF2                 | 0.49 | 0.00      | 0.02      |
| DASU_IL6_SIGNALING_SCAR_UP                             | 0.52 | 0.00      | 0.03      |
| VERRECCHIA_RESPONSE_TO_TGFB1_C2                        | 0.54 | 0.00      | 0.03      |
| BOQUEST_STEM_CELL_CULTURED_VS_FRESH_DN                 | 0.55 | 0.00      | 0.03      |
| TURASHVILI_BREAST_DUCTAL_CARCINOMA_VS_DUCTAL_NORMAL_DN | 0.39 | 0.00      | 0.03      |
| SCHUETZ_BREAST_CANCER_DUCTAL_INVASIVE_UP               | 0.35 | 0.00      | 0.03      |
| JECHLINGER_EPITHELIAL_TO_MESENCHYMAL_TRANSITION_UP     | 0.44 | 0.00      | 0.03      |
| PID_HEDGEHOG_2PATHWAY                                  | 0.55 | 0.01      | 0.03      |
| GUO_HEX_TARGETS_UP                                     | 0.43 | 0.00      | 0.04      |
| LEE_LIVER_CANCER_HEPATOBLAST                           | 0.62 | 0.01      | 0.04      |
| IVANOVA_HEMATOPOIESIS_STEM_CELL_LONG_TERM              | 0.35 | 0.00      | 0.04      |
| CHIANG_LIVER_CANCER_SUBCLASS_CTNNB1_DN                 | 0.38 | 0.00      | 0.04      |
| WHITFIELD_CELL_CYCLE_G1_S                              | 0.37 | 0.00      | 0.06      |
| CONRAD_STEM_CELL                                       | 0.50 | 0.02      | 0.06      |
| SAKAI_CHRONIC_HEPATITIS_VS_LIVER_CANCER_DN             | 0.49 | 0.02      | 0.06      |
| PLASARI_TGFB1_TARGETS_10HR_DN                          | 0.33 | 0.00      | 0.08      |
| ELVIDGE_HIF1A_AND_HIF2A_TARGETS_DN                     | 0.37 | 0.00      | 0.08      |
| ZHANG_GATA6_TARGETS_DN                                 | 0.39 | 0.01      | 0.09      |
| PID_BETA_CATENIN_DEG_PATHWAY                           | 0.54 | 0.05      | 0.09      |
| HAN_JNK_SINGALING_DN                                   | 0.45 | 0.02      | 0.09      |
| HOSHIDA_LIVER_CANCER_SURVIVAL_UP                       | 0.38 | 0.01      | 0.09      |

Table S3 List of antibodies used

1<sup>st</sup> Antibodies

| Name       | IgG type   | Use        | Dilution | Company        | Lot        |
|------------|------------|------------|----------|----------------|------------|
| ALB        | Goat pAB   | IF         | 100      | Bethyl         | A90-134A-6 |
| ANXA13     | Rabbit pAB | IF         | 100      | Sigma-Aldrich  | HPA019650  |
| CD11b      | Rat mAB    | FACS       | 100      | BD biosciences | 552850     |
| CD133      | Biotin     | FACS       | 100      | eBioscience    | 13-1331-82 |
| CD24       | Rat mAB    | FACS       | 100      | BD biosciences | 561079     |
| CD31       | Rat mAB    | FACS       | 100      | BD biosciences | 561410     |
| CD45       | Rat mAB    | FACS       | 100      | BD biosciences | 552848     |
| CK19       | Rabbit pAB | IF         | 500      | Cell Lab Tech  | A03189     |
| COLLECTRIN | Sheep pAB  | FACS       | 100      | R&D systems    | AF4965     |
| EpCAM      | Rat mAB    | IF         | 100      | BD biosciences | G8.8       |
| EpCAM      | Mouse mAB  | hulF, FACS | 100      | DAKO           | Ber-EP4    |
| FAH        | Rabbit pAB | IF         | 50       | Grompe lab     |            |
| HNF4A      | Rabbit pAB | IF         | 100      | Santa Cruz Bio | sc-8987    |
| MIC1-1C3   | Rat mAB    | FACS       | 20       | Grompe lab     |            |
| SLC34A2    | Rabbit pAB | FACS       | 100      | Abbiotech      | 251343     |
| ST14       | Rabbit pAB | FACS       | 100      | Abcam          | ab28266    |
| ST14       | Rabbit pAB | hulF, FACS | 100      | Invitrogen     | PA5-29764  |

2<sup>nd</sup> Antibodies

| Name             | IgG type     | Use  | Dilution | Company       | Lot         |
|------------------|--------------|------|----------|---------------|-------------|
| Anti rat DL649   | Mouse        | FACS | 200      | JacksonImmuno | 212-496-168 |
| Anti rabbit APC  | Donkey       | FACS | 200      | JacksonImmuno | 711-056-152 |
| Anti rabbit PE   | Donkey       | FACS | 200      | JacksonImmuno | 711-116-152 |
| Anti Rat PE      | Goat         | FACS | 200      | JacksonImmuno | 112-116-143 |
| Anti rabbit Cy3  | Donkey       | IF   | 250      | JacksonImmuno | 711-166-152 |
| Anti sheep AF647 | Donkey       | FACS | 250      | Jacksonimmuno | 713-606-147 |
| APC/cy7          | Streptavidin | FACS | 250      | Biologend     | 405208      |

Table S4 Human samples information

| Use              | Gender  | Age     | Source                                                |
|------------------|---------|---------|-------------------------------------------------------|
| IHC              | Unknown | Unknown | Gift from Strom lab at University of Pittsburg, U.S.A |
| FACS             | Female  | 17      | Lonza, LLC. U.S.A                                     |
| FACS             | Male    | 29      | Lonza, LLC. U.S.A                                     |
| FACS,<br>culture | Female  | 48      | Lonza, LLC. U.S.A                                     |
